# Supplementary material for: OsSCL30 overexpression reduces the tolerance of rice seedlings to low temperature, drought and salt
Source: PubMed Central journal article supplement (PMC9120446; doi:10.1038/s41598-022-12438-4), 2022-05-19
Supplement: 41598_2022_12438_MOESM1_ESM.pdf [file 41598_2022_12438_MOESM1_ESM.pdf]

# ***OsSCL30* overexpression reduces the tolerance of rice seedlings to low temperature, drought and salt**

**Jia Zhang<sup>a1</sup>, Yihao Sun<sup>a1</sup>, Zhanmei Zhou<sup>a</sup>, Yifan Zhang<sup>a</sup>, Yanmei Yang<sup>a</sup>, Xiaofei Zan<sup>a</sup>,  
Xiaohong Li<sup>a</sup>, Jiale Wan<sup>a</sup>, Xiaoling Gao<sup>a</sup>, Rongjun Chen<sup>a</sup>, Zhengjian Huang<sup>a</sup>, Lihua Li<sup>a\*</sup>,  
Zhengjun Xu<sup>a\*</sup>**

<sup>a</sup> Crop Ecophysiology and Cultivation Key Laboratory of Sichuan Province, Rice Research Institute of Sichuan Agricultural University, Chengdu, Sichuan 611130, China.

<sup>1</sup>These authors contributed equally to this work.

\* Correspondence: mywildrice@aliyun.com (Z.J.X) ; lilihua1976@tom.com (L.H.L)

Table S1. Primers used in this study.

| <b>Primers for generating DNA vectors (The underline showed the restriction enzyme sites)</b> |                                                                                        |                           |                                            |
|-----------------------------------------------------------------------------------------------|----------------------------------------------------------------------------------------|---------------------------|--------------------------------------------|
| Gene name (ID)                                                                                | Primer Sequence (5'-3') (Forward Primer/Reverse primer)                                | Bone vector               | Experimental purpose                       |
| <i>OsSCL30</i><br>(LOC_Os12g38430)                                                            | tggagaggacagcccaagcttATGAGGAGGTACAGCCCACCA /<br>gtaccgaattcccgggatccTCAGTCGCTGCGGGCAGG | D-163+1300                | <i>OsSCL30</i><br>overexpression<br>vector |
|                                                                                               | tggagaggacagcccaagcttATGAGGAGGTACAGCCCACCA<br>/ctcaccatgaccggtggatccTCGCTGCGGGCAGGGGAA | D-163+1300:<br>pAcGFP1-N1 | <i>OsSCL30</i> -GFP<br>fusion protein      |
| <b>Primers for qRT-PCR</b>                                                                    |                                                                                        |                           |                                            |
| Primers Name                                                                                  | Primer Sequence (5'-3') (Forward Primer/Reverse primer)                                | Gene ID                   |                                            |
| UBQ(ubiquitin)-F/R                                                                            | AACCAGCTGAGGCCCAAGA / ACGATTGATTAAACCAGTCCATG                                          | LOC_Os03g13170            |                                            |
| <i>OsSCL30</i> -qRT -F/R                                                                      | GTCTCGTTCCCGTTCTC / GTAGTCATCTCGCCGTCT                                                 | LOC_Os12g38430            |                                            |
| <i>OsPOD</i> - qRT -F/R                                                                       | AACGCAACCACCAAGCCG / CCTCGATCATGCCCATCTTGA                                             | LOC_Os01g73200            |                                            |
| <i>OsCATA</i> - qRT -F/R                                                                      | CCCCAAGGTCTCCCCTGA / AACGACTCATCACACTGGGAGAG                                           | LOC_Os02g02400            |                                            |
| <i>OsCu-ZnSOD2</i> - qRT -                                                                    | TGACACCACTAATGGCTGC/ CTAACCCTGGAGTCCGATGA                                              | LOC_Os07g46990            |                                            |

|                    |                                                |                |
|--------------------|------------------------------------------------|----------------|
| F/R                |                                                |                |
| OsRbohA- qRT -F/R  | GAGCGCGTCTGCCAATAAAC / TCAATGTAGCCGAGCCCTTC    | LOC_Os01g53294 |
| OsCBF2- qRT -F/R   | TACGGCAACATGGACTTCGA/ GCCCATCCCGTCGTAGTAGTAG   | LOC_Os06g03670 |
| OsCBF3- qRT -F/R   | AGCGACCTGGCGTTTCG/ TCGCGTAGTACAGGTCCCA         | LOC_Os09g35030 |
| OsDREB2A- qRT -F/R | GGCTGAGATCCGTGAACCAA / GGACCATACATTGCCCTTGC    | LOC_Os01g07120 |
| OsNAC6- qRT -F/R   | AGAAGGCCCTCGTCTTCTA / ACCTGAGGCTGTTCTTCTTG     | LOC_Os01g66120 |
| OsSCL30A- qRT -F/R | TCCGCAACATCCCTTTAAGC/ AACTCCACGAATGCAAACCC     | LOC_Os02g15310 |
| OsSCL25- qRT -F/R  | TCGGCCATTTCGGACAATTTG/ AATCCAAATCCACGCGGTTTC   | LOC_Os07g43950 |
| OsSCL26- qRT -F/R  | AGCACTATTCAAGCAGGTCTCC/ TCACCGGCTAACAGAAAGAGAC | LOC_Os03g25770 |
| OsSCL28- qRT -F/R  | GAGCAATTTGGCCCTGTAAAGG/ AATTCTTGCTTGGCCACTGC   | LOC_Os03g24890 |
| OsSCL57- qRT -F/R  | AGCGCGATATCACATGAACC/ TGTTTCGGCACTCTTCCTTTC    | LOC_Os11g47830 |
